# Supplementary material for: In Ovarian Cancer Multicellular Spheroids, Platelet Releasate Promotes Growth, Expansion of ALDH+ and CD133+ Cancer Stem Cells, and Protection against the Cytotoxic Effects of Cisplatin, Carboplatin and Paclitaxel
Source: MDPI journal article supplement (doi:10.3390/ijms22063019), 2021-03-16
Supplement: s1 [file s1]

**Supplemental Table S1.** Concentrations (pg/ml) of growth factors in PR pools.

|              | <i>pool 1</i> | <i>pool 2</i> | <i>pool 3</i> |
|--------------|---------------|---------------|---------------|
| EGF          | 978           | 971           | 1091          |
| VEGF         | 844           | 739           | 1030          |
| FGF          | 11            | 8             | 9             |
| IGF-1        | 79074         | 72500         | 83422         |
| PDGF-AA      | 8948          | 11777         | 10201         |
| PDGF-AB      | 52940         | 60230         | 44794         |
| PDGF-BB      | 22103         | 22361         | 20148         |
| TGF- $\beta$ | 83900         | 81068         | 84401         |
| CCL5         | 635           | 771           | 698           |

Growth factor concentration values evaluated by Elisa assay measured in 3 different PR pools.

EGF, epidermal growth factor; VEGF, vascular endothelial growth factor; FGF, fibroblast growth factor; IGF-1, insulin-like growth factor-1; PDGF-AA, -AB and -BB, platelet-derived growth factor isoforms AA, AB and BB; TGF- $\beta$ , transforming growth factor beta; CCL5, chemokine (C-C motif) ligand 5.

**Supplemental Table S2. Growth inhibition by carboplatin, cisplatin and paclitaxel in OVCAR5, OVCAR8 and MDAH ovarian cancer cell lines.**

| drug        | OVCAR5           |                  | OVCAR8           |                  | MDAH             |                  |
|-------------|------------------|------------------|------------------|------------------|------------------|------------------|
|             | IC <sub>50</sub> | IC <sub>75</sub> | IC <sub>50</sub> | IC <sub>75</sub> | IC <sub>50</sub> | IC <sub>75</sub> |
| CDBCA (μM)  | 89.2 ± 8.0       | 123.2 ± 11.1     | 59.8 ± 0.5       | 124.6 ± 11.2     | 21 ± 1.9         | 83 ± 7.5         |
| CDDP (μM)   | 11.9 ± 1.0       | 40.1 ± 3.6       | 6.1 ± 0.4        | 17.8 ± 0.8       | 4.3 ± 0.4        | 10.2 ± 0.9       |
| PTX (ng/ml) | 25.3 ± 2.2       | 69.2 ± 6.2       | 155.3 ± 16.9     | 489.5 ± 30.3     | 2.6 ± 0.3        | 3.4 ± 0.2        |

Cell lines were exposed to increasing concentrations of carboplatin (CDBCA), cisplatin (CDDP) and paclitaxel (PTX). After 72 h viable cells were evaluated by MTT assay. Results represent the mean ± SD of three replicate wells from three independent experiments. IC<sub>50</sub> and IC<sub>75</sub> values were calculated using the CalcuSyn software (1).

- (1) Chou TC, Talalay P. Quantitative analysis of dose-effect relationships: the combined effects of multiple drugs or enzyme inhibitors. *Adv Enzyme Regul* 1984;22:27-55.

## Supplemental Figure S1

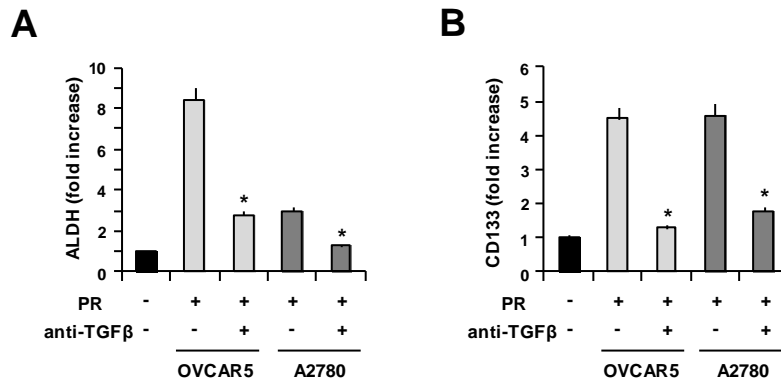

**Supplemental Figure S1. Anti-TGFβ inhibited the increase of both ALDH activity and CD133 expression by PR in OvCa cells.** OVCAR5 and A2780 cells were treated for 5 days with or without 10% PR and TGFβ blocking antibody (5 μg/ml)[1]. Then cells were dissociated into single-cell suspensions by trypsinization and ALDH activity and CD133 expression were evaluated by flow cytometry. Results represent the percentage of ALDH (A) and CD133 (B) positive cells and are expressed as fold increase respect to untreated cells. \* $P < 0.01$  (PR treated vs. anti-TGFβ-PR treated cells).

1. Cho MS, Bottsford-Miller J, Vasquez HG, Stone R, Zand B, Kroll MH, et al. Platelets increase the proliferation of ovarian cancer cells. *Blood*. 2012;120:4869–72.
